# Supplementary material
Source: PubMed Central journal article supplement (PMC5905395)
Supplement: en.2018-00011.sf1.pdf [file en.2018-00011.sf1.pdf]

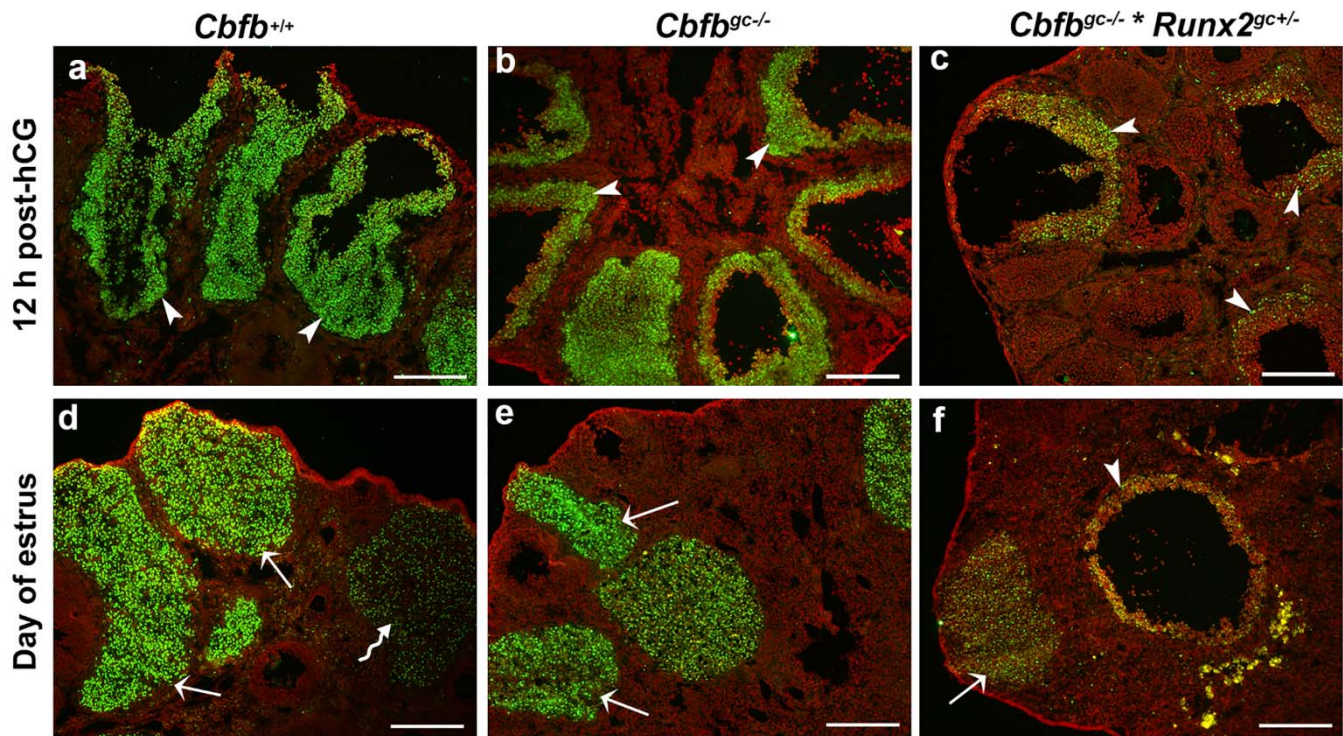

**Fig. S1** Immunohistochemical detection of RUNX2 in ovaries of control (*Cbfb*<sup>+/+</sup>) and mutant (*Cbfb*<sup>gc/-</sup> and *Cbfb*<sup>gc/-</sup> \* *Runx2*<sup>gc+/-</sup>) mice collected at 12 h post-hCG (a, b & c) from immature animals and in the morning of estrus (d, e, & f) from 5 months old animals. Immunopositive nuclear staining for RUNX2 protein (green) was localized to granulosa cells of periovulatory follicles (arrowheads), newly forming corpora lutea (arrows), and corpora lutea from previous cycles (wavy arrows). The sections were counterstained with propidium iodide (red) for nuclear staining. The immunopositive staining for RUNX2 was reduced in periovulatory follicles and newly formed CL in *Cbfb*<sup>gc/-</sup> \* *Runx2*<sup>gc+/-</sup> mice compared to *Cbfb*<sup>+/+</sup> and *Cbfb*<sup>gc/-</sup> mice. Scale bars, 250  $\mu$ m for all images.

**Table 1.** List of Primers for mRNA Quantification and Genotyping

| <b>Gene</b>                      | <b>DNA sequence for primers (5'-3')</b>                                        |
|----------------------------------|--------------------------------------------------------------------------------|
| <i>Areg</i>                      | AAAAGAATCCATGCACTGCC<br>TGTCATCCTCGCTGTGAGTC                                   |
| <i>Ccrl2</i>                     | TCCTTCCCGACTGATACCAC<br>GACAAAACAGCGTCGTTTGA                                   |
| <i>Edn2</i>                      | CTCCTGGCTTGACAAGGAAG<br>GCTGTCTGTCCCGCAGTGRR                                   |
| <i>Ereg</i>                      | TTCAGATGGAAGACGATCCC<br>CGCAACGTATTCTTTGCTCA                                   |
| <i>Gas1</i>                      | AGATGGTCGGGAACACTGAC<br>TCCCTTCTCCAAGTCCATTG                                   |
| <i>Hp</i>                        | GGCTATGTGGAGCACTTGGT<br>TCACATTCGGGGAGTTTCTC                                   |
| <i>Lhcgr</i>                     | CGCTTTCCAAGGGATGAATA<br>CTGGAGGGCAGAGTTTTTTCAG                                 |
| <i>Lipg</i>                      | TCTAAGGACCCAGAGCAGGA<br>TGTACAGCTGATGAGCCAGG                                   |
| <i>Prlr</i>                      | TTTTGCACATGAACCCTGAA<br>ACCAGCAGGTGAATGTTTCC                                   |
| <i>Ptgfr</i>                     | TGTTTCTTCTCGTGCAATG<br>AGATCTGATTCCACGTTGCC                                    |
| <i>Ptgs1</i>                     | CTTCTCCACGATCTGGCTTC<br>GAGCTGCAGGAAATAGCCAC                                   |
| <i>Saa3</i>                      | GTTGACAGCCAAAGATGGGT<br>GATGACTTTAGCAGCCCAGG                                   |
| <i>Sfrp4</i>                     | CTCAGGTATGTTGCCAGGGT<br>CTCAGGTATGTTGCCAGGGT                                   |
| <i>Sgk1</i>                      | AGGGCAGTTTTGGAAAGGTT<br>CAGAACATTCCGCTCTGACA                                   |
| <i>Wnt4</i>                      | CTGGAGAAGTGTGGCTGTGA<br>GGACGTCCACAAAGGACTGT                                   |
| <i>L19</i>                       | CCAAGAAGATTGACCGCCATA<br>CAGCTTGTGGATGTGCTCCAT                                 |
| <i>Cxcr4</i>                     | CAAGCAAGGATGTGACTTCGAGAG<br>CCGAGGAAGGCATAGAGGATGG                             |
| <i>Runx1</i>                     | CCAGCAAGCTGAGGAGCGGCG<br>CCGACAAACCTGAGGTCGTTG                                 |
| <i>Runx2</i>                     | GTTATGAAAAACCAAGTAGCCAGGT<br>GTAATCTGACTCTGTCCTTGTGGAT                         |
| <i>Cbfb</i>                      | CCTTTGAAGAGGCTCGAAGA<br>CTGGTCGCCCAATGAGTTAT                                   |
| <i>Runx2 flox<br/>(genotype)</i> | ACCAAATTAAGGGCCAGCTC<br>TTGAAACCATCCACAGGTGA                                   |
| <i>Cbfb flox<br/>(genotype)</i>  | CCTCCTCATTCTAACAGGAATC<br>GGTTAGGAGTCATTGTGATCAC                               |
| <i>Esr2 cre<br/>(genotype)</i>   | CAGGTGCTGTTGGATGGTCTTC<br>CTTAGTTACTCCGGCAGCTTGAAC<br>AGGGGAAGTAAGGCTTGATGGTGA |

**Table 2.** List of Genes and Their Official Full Name

| <b>Official Symbol</b> | <b>Official Full Name</b>                                                                       |
|------------------------|-------------------------------------------------------------------------------------------------|
| <i>Cyp19a1</i>         | Cytochrome P450 family 19 subfamily A member 1                                                  |
| <i>Runx1</i>           | Runt-related transcription factor 1                                                             |
| <i>Runx2</i>           | Runt-related transcription factor 2                                                             |
| <i>Runx3</i>           | Runt-related transcription factor 3                                                             |
| <i>Cbfb</i>            | Core binding factor $\beta$ subunit                                                             |
| <i>Lhcgr</i>           | Luteinizing hormone/choriogonadotropin receptor                                                 |
| <i>Sfrp4</i>           | Secreted frizzled-related protein 4                                                             |
| <i>Esr2</i>            | Estrogen receptor 2                                                                             |
| <i>Edn2</i>            | Endothelin 2                                                                                    |
| <i>Ptgs1</i>           | Prostaglandin-endoperoxide synthase 1                                                           |
| <i>Lipg</i>            | Lipase G, endothelial type                                                                      |
| <i>Saa3</i>            | Serum amyloid A 3                                                                               |
| <i>Ptgfr</i>           | Prostaglandin F receptor                                                                        |
| <i>Ccr12</i>           | Chemokine (C-C motif) receptorlike 2                                                            |
| <i>Cxcr4</i>           | C-X-C motif chemokine receptor 4                                                                |
| <i>Areg</i>            | Amphiregulin                                                                                    |
| <i>Sgk1</i>            | Serum/glucocorticoid-regulated kinase 1                                                         |
| <i>Ereg</i>            | Epiregulin                                                                                      |
| <i>Cyp11a1</i>         | Cytochrome P450 family 11 subfamily A member 1                                                  |
| <i>Star</i>            | Steroidogenic acute regulatory protein                                                          |
| <i>Hsd3b</i>           | Hydroxy- $\Delta$ -5-steroid dehydrogenase, 3 $\beta$ - and steroid $\Delta$ -isomerase cluster |
| <i>Parm1</i>           | Prostate androgen-regulated mucinlike protein 1                                                 |
| <i>Wnt4</i>            | Wingless-type MMTV integration site family, member 4                                            |
| <i>Gas1</i>            | Growth arrest specific 1                                                                        |
| <i>Hp</i>              | Haptoglobin                                                                                     |
| <i>Prlr</i>            | Prolactin receptor                                                                              |
